# Supplementary material
Source: PubMed Central journal article supplement (PMC8765287)
Supplement: aac.01627-21-s0001.pdf [file aac.01627-21-s0001.pdf]

## Table of Contents

|                                                                                                                                                                                               |           |
|-----------------------------------------------------------------------------------------------------------------------------------------------------------------------------------------------|-----------|
| <b>Supplementary Table 1: Excluded studies at full-text extraction, with reasons for exclusion.....</b>                                                                                       | <b>2</b>  |
| <b>Supplementary Table 2: Characteristics of Included Studies (<math>n = 32</math>).....</b>                                                                                                  | <b>3</b>  |
| <b>Supplementary Table 3: List of serial non-inferiority trials of invasive candidiasis.....</b>                                                                                              | <b>6</b>  |
| <b>Supplementary Table 4: Risk of bias assessment for individual included studies (RoB 2.0).....</b>                                                                                          | <b>7</b>  |
| <b>Supplementary Figure 1: PRISMA Flow Diagram of Study Selection Process.....</b>                                                                                                            | <b>10</b> |
| <b>Supplementary Figure 2: Subgroup analyses of included studies, stratified by systemic treatment, systemic prophylaxis, .....<br/>and topical treatment antifungal non-inferiority RCTs</b> | <b>11</b> |
| <b>Supplementary Figure 3: Risk of bias assessment across individual included studies (RoB 2.0).....</b>                                                                                      | <b>12</b> |
| <b>Supplementary Text 1a: PRISMA 2020 Checklist.....</b>                                                                                                                                      | <b>13</b> |
| <b>Supplementary Text 1b: PRISMA 2020 Checklist for Abstracts.....</b>                                                                                                                        | <b>16</b> |
| <b>Supplementary Text 2: Search strategies for MEDLINE, Embase, and Cochrane CENTRAL.....</b>                                                                                                 | <b>17</b> |
| <b>References .....</b>                                                                                                                                                                       | <b>19</b> |

**Supplementary Table 1: Excluded studies at full-text extraction, with reasons for exclusion**

| Primary author | Year | Journal                    | Title                                                                                                                                                                      | Reason for exclusion                                                           |
|----------------|------|----------------------------|----------------------------------------------------------------------------------------------------------------------------------------------------------------------------|--------------------------------------------------------------------------------|
| Alomar         | 1992 | Arznei-forschung           | Multi-centre double-blind trial on the efficacy and safety of sertaconazole 2% cream in comparison with miconazole 2% cream on patients suffering from cutaneous mycoses   | Incorrect study design; not a non-inferiority trial                            |
| Denning        | 2006 | J Infection                | Micafungin (FK463), alone or in combination with other systemic antifungal agents, for the treatment of acute invasive aspergillosis                                       | Incorrect study design; not a non-inferiority trial                            |
| Fischer        | 2013 | Transplant Int             | Micafungin as antifungal prophylaxis in high-risk liver transplantation: a randomised multicentre trial                                                                    | Duplicate publication of included study (Saliba 2015)                          |
| Gobbato        | 2018 | Int J Pharmacol Clin Ther  | Dapaconazole versus ketoconazole in the treatment of interdigital tinea pedis                                                                                              | Phase II RCT                                                                   |
| Goswami        | 2020 | Am J Trop Med Hyg          | Combination Therapy Against Indian Visceral Leishmaniasis with Liposomal Amphotericin B (Fungisome™) and Short-Course Miltefosine in Comparison to Miltefosine Monotherapy | Incorrect study population; use of antifungal to treat parasitic infection     |
| Kontoyiannis   | 2009 | Transpl Infect Dis         | Micafungin alone or in combination with other systemic antifungal therapies in hematopoietic stem cell transplant recipients with invasive aspergillosis                   | Incorrect study design; not a head-to-head comparison of different antifungals |
| López-Olmos    | 2003 | Clin Invest Ginecol Obstet | Comparación de fenticonazol frente a sertaconazol en dosis única para el tratamiento de las candidiasis vulvovaginales: estudio prospectivo y multicéntrico de un año      | Incorrect study design; not a non-inferiority trial                            |
| MK-5592-069    | 2020 | n/a                        | A Study of the Safety and Efficacy of Posaconazole Versus Voriconazole for the Treatment of Invasive Aspergillosis (MK-5592-069)                                           | Unpublished data as of date of systematic review                               |
| Park           | 2006 | Korean J Int Med           | Intravenous itraconazole vs. amphotericin B deoxycholate for empirical antifungal therapy in patients with persistent neutropenic fever                                    | Incorrect study design; case-control study                                     |
| Pedragosa      | 1992 | Arznei-forschung           | Therapeutic efficacy and safety of the new antimycotic sertaconazole in the treatment of cutaneous dermatophytosis                                                         | Incorrect study design; not a non-inferiority trial                            |
| Ullmann        | 2006 | Clin Infect Dis            | Prospective Study of Amphotericin B Formulations in Immunocompromised Patients in 4 European Countries                                                                     | Incorrect study design; observational trial                                    |
| White          | 1998 | Clin Infect Dis            | Randomized, double-blind clinical trial of amphotericin B colloidal dispersion vs. amphotericin B in the empirical treatment of fever and neutropenia                      | Incorrect study design; not a non-inferiority trial                            |

**Supplementary Table 2: Characteristics of Included Studies (*n* = 32)**

| Reference               | Study Period and Population   | Study Blinding | Infectious syndrome         | Treatment arm ( <i>n</i> )    | Control arm ( <i>n</i> )          | Primary outcome                         | Non-inferiority margin  | Results, point estimate (95% CI)                        | Author's conclusion     | Conclusion by data      |
|-------------------------|-------------------------------|----------------|-----------------------------|-------------------------------|-----------------------------------|-----------------------------------------|-------------------------|---------------------------------------------------------|-------------------------|-------------------------|
| Benjamin 2018 (1)       | 2013-2014 Children            | Double blind   | Candidiasis                 | Micafungin IV (20)            | AmB deoxycholate IV (10)          | Fungal-free survival                    | 20%                     | Not reported                                            | Noninferiority shown    | Unable to determine     |
| Buechner 2014 (2)       | n/a Adults                    | Double blind   | Cutaneous mycosis           | Miconazole shampoo (145)      | Ketoconazole shampoo (129)        | Reduction in symptom scale              | -1 unit on analog scale | PP: 0.009 (-0.684, 0.703)                               | Noninferiority shown    | Noninferiority shown    |
| Chosidow 2003 (3)       | n/a Adults                    | Open label     | Cutaneous mycosis           | Ciclopiroxolamine cream (154) | Ketoconazole gel (149)            | 28-day clinical response                | 15%                     | ITT: 2.78 (-7.99, 13.56)<br>PP: 3.22 (-8.06, 14.5)      | Noninferiority shown    | Noninferiority shown    |
| Cornely 2007 (4)        | 2002-2005 Children and adults | Unclear        | Prophylaxis, non-transplant | Posaconazole (304)            | Fluconazole or itraconazole (298) | Proven/probable IFI during treatment    | 4%                      | ITT: -6 (-9.7, -2.5)                                    | Superiority shown       | Superiority shown       |
| de la Paz Cota 2018 (5) | 2013-2014 Adults              | Double blind   | Otomycosis                  | Eberconazole drops (95)       | Clotrimazole drops (95)           | Complete response                       | 10%                     | ITT: -1.7 (-11.4, 7.9)                                  | Noninferiority rejected | Noninferiority rejected |
| de Wet 2004 (6)         | n/a Adults                    | Double blind   | Candidiasis                 | Micafungin IV (260)           | Fluconazole IV (258)              | Endoscopic cure rate                    | 10%                     | ITT: -0.3 (-5.9, 5.3)                                   | Noninferiority shown    | Noninferiority shown    |
| Huang 2012 (7)          | 2008-2009 Adults              | Open label     | Prophylaxis, transplant     | Micafungin IV (136)           | Itraconazole IV (147)             | Treatment success                       | 10%                     | ITT: -2.04 (-7.562, 3.482)<br>PP: -0.86 (-7.489, 5.767) | Noninferiority shown    | Noninferiority shown    |
| Jeong 2016 (8)          | 2012-2014 Adults              | Unclear        | Febrile neutropenia         | Micafungin IV (73)            | Itraconazole IV (75)              | Treatment success                       | 10%                     | ITT: 7.10 (no CI given)                                 | Noninferiority shown    | Unable to determine     |
| Kang 2020 (9)           | 2012-2015 Adults              | Open label     | Prophylaxis, transplant     | Micafungin IV (69)            | Fluconazole IV (77)               | Clinical success                        | 10%                     | PP: -0.45 (-6.93, 5.59)                                 | Noninferiority shown    | Noninferiority shown    |
| Kohno 2010 (10)         | 2006-2008 Adults              | Open label     | Aspergillosis               | Micafungin IV (53)            | Voriconazole IV (54)              | Treatment response                      | 15%                     | ITT: 10.3 (-8.63, 29.25)<br>PP: 6.8 (-12.92, 26.54)     | Noninferiority shown    | Noninferiority rejected |
| Krause 2004 (11)        | 2001-2002 Adults              | Double blind   | Candidiasis                 | Anidulafungin IV (249)        | Fluconazole PO (255)              | Endoscopic response                     | 10%                     | ITT: -1.3 (-6.7, 3.9)<br>PP: -1.6 (-4.1, 0.8)           | Noninferiority shown    | Noninferiority shown    |
| Kullberg 2005 (12)      | 1998-2003 Children and adults | Open label     | Candidemia                  | Voriconazole IV (240)         | AmB IV f/b fluconazole IV (120)   | Mycologic eradication and clinical cure | 15%                     | mITT: 0 (-10.6, 10.6)                                   | Noninferiority shown    | Noninferiority shown    |

|                          |                               |              |                                         |                                                                          |                                                               |                                                |              |                                                                                          |                         |                         |
|--------------------------|-------------------------------|--------------|-----------------------------------------|--------------------------------------------------------------------------|---------------------------------------------------------------|------------------------------------------------|--------------|------------------------------------------------------------------------------------------|-------------------------|-------------------------|
| Kullberg 2019 (13)       | n/a Adults                    | Double blind | Candidiasis                             | Isavuconazole IV (199)                                                   | Caspofungin IV (201)                                          | Mycologic eradication and clinical cure        | 15%          | mITT: -10.8 (-19.9, -1.8)                                                                | Noninferiority rejected | Noninferiority rejected |
| Kuse 2007 (14)           | 2003-2004 Adults              | Double blind | Candidiasis                             | Micafungin IV (202)                                                      | Liposomal AmB IV (190)                                        | Treatment success                              | 15%          | ITT: 3.9 (-3.9, 11.6)<br>mITT: 4.9 (-3, 12.8)<br>PP: 0.7 (-5.3, 6.7)                     | Noninferiority shown    | Noninferiority shown    |
| Le 2017 (15)             | 2012-2015 Adults              | Open label   | Talaromyces                             | Itraconazole IV (217)                                                    | AmB deoxycholate IV (218)                                     | 2-week all-cause mortality                     | 10%          | ITT: 0.9 (-3.9, 5.6)<br>mITT: 2.2 (-2.4, 6.8)<br>PP: 1.6 (-3, 6.2)                       | Superiority shown       | Noninferiority shown    |
| Maertens 2016 (16)       | 2007-2013 Adults              | Double blind | Invasive mould infection                | Isavuconazole IV (258)                                                   | Voriconazole IV (258)                                         | 42-day all-cause mortality                     | 10%          | ITT: -1 (-7.8, 5.7)<br>mITT: -2.6 (-12.2, 6.9)                                           | Noninferiority shown    | Unable to determine     |
| Marks 2010 (17)          | 2006-2009 Children and adults | Open label   | Prophylaxis, transplant                 | Voriconazole IV (224)                                                    | Itraconazole IV (241)                                         | Success of prophylaxis                         | 10%          | mITT: 16.4 (7.7, 25.1)                                                                   | Superiority shown       | Superiority shown       |
| Mersal 2013 (18)         | 2011-2012 Children            | Unclear      | Prophylaxis, extremely low birth weight | Nystatin PO (24)                                                         | Fluconazole IV (33)                                           | Incidence of invasive <i>Candida</i> infection | 15%          | Not reported                                                                             | Noninferiority shown    | Unable to determine     |
| Molloy 2018 (19)         | 2013-2016 Adults              | Open label   | Cryptococcosis                          | Fluconazole and flucytosine PO (225)                                     | AmB IV and either fluconazole or flucytosine PO (453)         | 2-week all-cause mortality                     | 10%          | ITT: -3.18 (-10.50, 4.15)<br>PP: -3.44 (-10.88, 4.00)                                    | Noninferiority shown    | Unable to determine     |
| Mora-Duarte 2002 (20)    | 1997-2001 Adults              | Double blind | Candidiasis                             | Caspofungin IV followed by either caspofungin IV or fluconazole PO (109) | AmB deoxycholate f/b AmB deoxycholate or fluconazole PO (115) | Overall response                               | 20%          | mITT: 12.7 (-0.7, 26)<br>PP: 15.4 (1.1, 29.7)                                            | Superiority shown       | Noninferiority shown    |
| Pappas 2007 (21)         | 2004-2006 Adults              | Double blind | Candidiasis                             | Micafungin IV f/b optional fluconazole PO (390)                          | Caspofungin IV f/b optional fluconazole PO (188)              | Treatment success                              | 15%          | Micafungin 100mg<br>mITT: 4.1 (-4.4, 12.3)<br>Micafungin 200mg<br>mITT: -1.0 (-9.3, 7.8) | Noninferiority shown    | Noninferiority shown    |
| Queiroz-Telles 2008 (22) | 2003-2005 Children            | Double blind | Candidiasis                             | Micafungin IV (48)                                                       | Liposomal AmB IV (50)                                         | Treatment success                              | Not reported | mITT: -2.4 (-20.1, 15.3)<br>PP: -1.8 (-16.4, 12.7)                                       | Noninferiority shown    | Unable to determine     |
| Reboli 2007 (23)         | 2003-2004 Adults              | Double blind | Candidiasis                             | Anidulafungin IV (127)                                                   | Fluconazole IV (118)                                          | Global response                                | 20%          | mITT: 15.4 (3.9, 27)                                                                     | Superiority shown       | Superiority shown       |
| Rex 1994 (24)            | 1989-1993                     | Open label   | Candidemia                              | Fluconazole IV (103)                                                     | AmB IV (103)                                                  | Treatment success                              | 20%          | ITT: -8 (-20, 3)<br>mITT: -9 (-23, 5)                                                    | Noninferiority shown    | Unable to determine     |

|                     |                               |              |                                                 |                                                            |                                                      |                             |     |                                                                                                                                          |                      |                         |
|---------------------|-------------------------------|--------------|-------------------------------------------------|------------------------------------------------------------|------------------------------------------------------|-----------------------------|-----|------------------------------------------------------------------------------------------------------------------------------------------|----------------------|-------------------------|
|                     | Children and adults           |              |                                                 |                                                            |                                                      |                             |     | PP: -11 (-18, 0)                                                                                                                         |                      |                         |
| Saliba 2015 (25)    | 2009-2012 Adults              | Open label   | Prophylaxis, high-risk liver transplant         | Micafungin (172)                                           | Fluconazole or caspofungin or liposomal AmB IV (172) | Clinical success            | 10% | ITT: -2.9 (-8, 1.9)<br>PP: 0.7 (-2.7, 4.4)                                                                                               | Noninferiority shown | Noninferiority shown    |
| van Burik 2004 (26) | 1999-2000 Children and adults | Double blind | Prophylaxis, hematopoietic stem cell transplant | Micafungin IV (425)                                        | Fluconazole IV (457)                                 | Treatment success           | 10% | mITT: 6.5 (0.9, 12)                                                                                                                      | Superiority shown    | Superiority shown       |
| Vazquez 2010 (27)   | 2006-2007 Adults              | Double blind | Oropharyngeal candidiasis                       | Miconazole PO (290)                                        | Clotrimazole PO (287)                                | Clinical cure               | 15% | ITT: -0.045 (-0.124, 0.034)<br>PP: -0.059 (-0.14, 0.022)                                                                                 | Noninferiority shown | Noninferiority shown    |
| Walsh 1999 (28)     | 1995-1996 Children and adults | Double blind | Febrile neutropenia                             | Liposomal AmB IV (343)                                     | AmB IV (344)                                         | Treatment success           | 10% | mITT: -0.7 (-1, 1)                                                                                                                       | Noninferiority shown | Noninferiority shown    |
| Walsh 2002 (29)     | 1998-1999 Children and adults | Open label   | Febrile neutropenia                             | Voriconazole IV (415)                                      | Liposomal AmB IV (422)                               | Treatment success           | 10% | mITT: -4.5 (-10.6, 1.6)                                                                                                                  | Noninferiority shown | Noninferiority rejected |
| Walsh 2004 (30)     | 2000-2002 Adults              | Double blind | Febrile neutropenia                             | Caspofungin IV (556)                                       | Liposomal AmB IV (539)                               | Overall response            | 10% | mITT: 0.2 (-5.6, 6)                                                                                                                      | Noninferiority shown | Noninferiority shown    |
| Yim 2010 (31)       | 2005 Children and adults      | Double blind | Cutaneous mycosis                               | Fluconazole 0.5% cream (92)<br>Fluconazole 1.0% cream (93) | Flutrimazole 1% cream (92)                           | Mycologic cure              | 20% | Fluconazole 0.5% cream<br>PP: 0.8 (-17.2, upper bound not reported)<br>Fluconazole 1.0% cream<br>PP: 7.2 (5.6, upper bound not reported) | Noninferiority shown | Unable to determine     |
| Yoshida 2020 (32)   | 2011-2015 Adults              | Open label   | Febrile neutropenia                             | Itraconazole IV (52)                                       | Liposomal AmB IV (50)                                | Overall favourable response | 10% | ITT: 0.04 (-0.15, 0.23)                                                                                                                  | Unable to determine  | Unable to determine     |

**Abbreviations:** AmB = amphotericin B; f/b = followed by; ITT = intention-to-treat; mITT = modified intention-to-treat; PO = oral; PP = per-protocol; IV = intravenous

**Supplementary Table 3: List of serial non-inferiority trials of invasive candidiasis**

| Pair | Trial 1: Antifungal B vs. A                                                                                                                                                                                                                                                                                                                                                                                                                    | Trial 2: Antifungal C vs. B                                                                                                                                                                                                                                                                                                                                                                                  |
|------|------------------------------------------------------------------------------------------------------------------------------------------------------------------------------------------------------------------------------------------------------------------------------------------------------------------------------------------------------------------------------------------------------------------------------------------------|--------------------------------------------------------------------------------------------------------------------------------------------------------------------------------------------------------------------------------------------------------------------------------------------------------------------------------------------------------------------------------------------------------------|
| 1    | <p>Mora-Duarte 2002 (20)<br/>                     Treatment arm: Caspofungin followed by continuation or fluconazole<br/>                     Comparison arm: Amphotericin B deoxycholate followed by continuation or fluconazole<br/>                     Syndrome: Invasive candidiasis<br/>                     Outcome: Overall response<br/>                     Risk difference: 12.7%<br/>                     95% CI: -0.7% to 26%</p> | <p>Pappas 2007 (21)<br/>                     Treatment arm: Micafungin 100mg, then optional fluconazole<br/>                     Comparison arm: Caspofungin<br/>                     Syndrome: Invasive candidiasis<br/>                     Outcome: Treatment success<br/>                     Risk difference: 4.1%<br/>                     95% CI: -4.4% to 12.3%</p>                                  |
| 2    | <p>Mora-Duarte 2002 (20)<br/>                     Treatment arm: Caspofungin followed by continuation or fluconazole<br/>                     Comparison arm: Amphotericin B deoxycholate followed by continuation or fluconazole<br/>                     Syndrome: Invasive candidiasis<br/>                     Outcome: Overall response<br/>                     Risk difference: 12.7%<br/>                     95% CI: -0.7% to 26%</p> | <p>Pappas 2007 (21)<br/>                     Treatment arm: Micafungin 150mg, then optional fluconazole<br/>                     Comparison arm: Caspofungin 150mg, then optional fluconazole<br/>                     Syndrome: Invasive candidiasis<br/>                     Outcome: Treatment success<br/>                     Risk difference: -1.0%<br/>                     95% CI: -9.3% to 7.8%</p> |
| 3    | <p>Mora-Duarte 2002 (20)<br/>                     Treatment arm: Caspofungin followed by continuation or fluconazole<br/>                     Comparison arm: Amphotericin B deoxycholate followed by continuation or fluconazole<br/>                     Syndrome: Invasive candidiasis<br/>                     Outcome: Overall response<br/>                     Risk difference: 12.7%<br/>                     95% CI: -0.7% to 26%</p> | <p>Kullberg 2019 (13)<br/>                     Treatment arm: Isavuconazole<br/>                     Comparison arm: Caspofungin<br/>                     Syndrome: Invasive candidiasis<br/>                     Outcome: Overall response in mITT population<br/>                     Risk difference: -10.8%<br/>                     95% CI: -19.9% to -1.8%</p>                                         |

**Supplementary Table 4: Risk of bias assessment for individual included studies (RoB 2.0)**

-  Low risk
-  Some concerns
-  High risk

- D1 Randomisation process
- D2 Deviations from the intended interventions
- D3 Missing outcome data
- D4 Measurement of the outcome
- D5 Selection of the reported result

| <u>Study</u>        | <u>D1</u>                                                                           | <u>D2</u>                                                                           | <u>D3</u>                                                                           | <u>D4</u>                                                                           | <u>D5</u>                                                                            | <u>Overall</u>                                                                        |
|---------------------|-------------------------------------------------------------------------------------|-------------------------------------------------------------------------------------|-------------------------------------------------------------------------------------|-------------------------------------------------------------------------------------|--------------------------------------------------------------------------------------|---------------------------------------------------------------------------------------|
| Benjamin 2018       |   |   |   |   |   |   |
| Buechner 2014       |  |  |  |  |  |  |
| Chosidow 2003       |  |  |  |  |  |  |
| Cornely 2007        |  |  |  |  |  |  |
| de la Paz Cota 2018 |  |  |  |  |  |  |
| de Wet 2004         |  |  |  |  |  |  |

|                     |   |   |   |   |   |   |
|---------------------|---|---|---|---|---|---|
| Huang 2012          | ! | ! | + | ! | + | ! |
| Jeong 2016          | + | ! | + | ! | - | - |
| Kang 2020           | ! | ! | + | ! | + | ! |
| Kohno 2010          | ! | ! | + | + | - | - |
| Krause 2004         | + | + | + | + | + | + |
| Kullberg 2005       | - | - | + | + | + | - |
| Kullberg 2019       | ! | + | + | + | + | ! |
| Kuse 2007           | + | + | ! | + | + | ! |
| Le 2017             | + | ! | + | + | + | ! |
| Maertens 2016       | ! | + | + | + | + | ! |
| Marks 2010          | + | ! | ! | + | + | ! |
| Mersal 2013         | - | - | - | + | - | - |
| Molloy 2018         | + | - | + | + | + | - |
| Mora-Duarte 2002    | - | + | + | + | + | - |
| Pappas 2007         | - | + | + | + | + | - |
| Queiroz-Telles 2008 | ! | + | + | + | - | - |
| Reboli 2007         | - | + | - | + | - | - |
| Rex 1994            | + | ! | + | + | + | ! |



|                |                                                                                   |                                                                                   |                                                                                   |                                                                                   |                                                                                    |                                                                                     |
|----------------|-----------------------------------------------------------------------------------|-----------------------------------------------------------------------------------|-----------------------------------------------------------------------------------|-----------------------------------------------------------------------------------|------------------------------------------------------------------------------------|-------------------------------------------------------------------------------------|
| Saliba 2015    |  |  |  |  |  |  |
| van Burik 2004 |  |  |  |  |  |  |
| Vazquez 2010   |  |  |  |  |  |  |
| Walsh 1999     |  |  |  |  |  |  |
| Walsh 2002     |  |  |  |  |  |  |
| Walsh 2004     |  |  |  |  |  |  |
| Yim 2010       |  |  |  |  |  |  |
| Yoshida 2020   |  |  |  |  |  |  |

Supplementary Figure 1: PRISMA Flow Diagram of Study Selection Process (33)

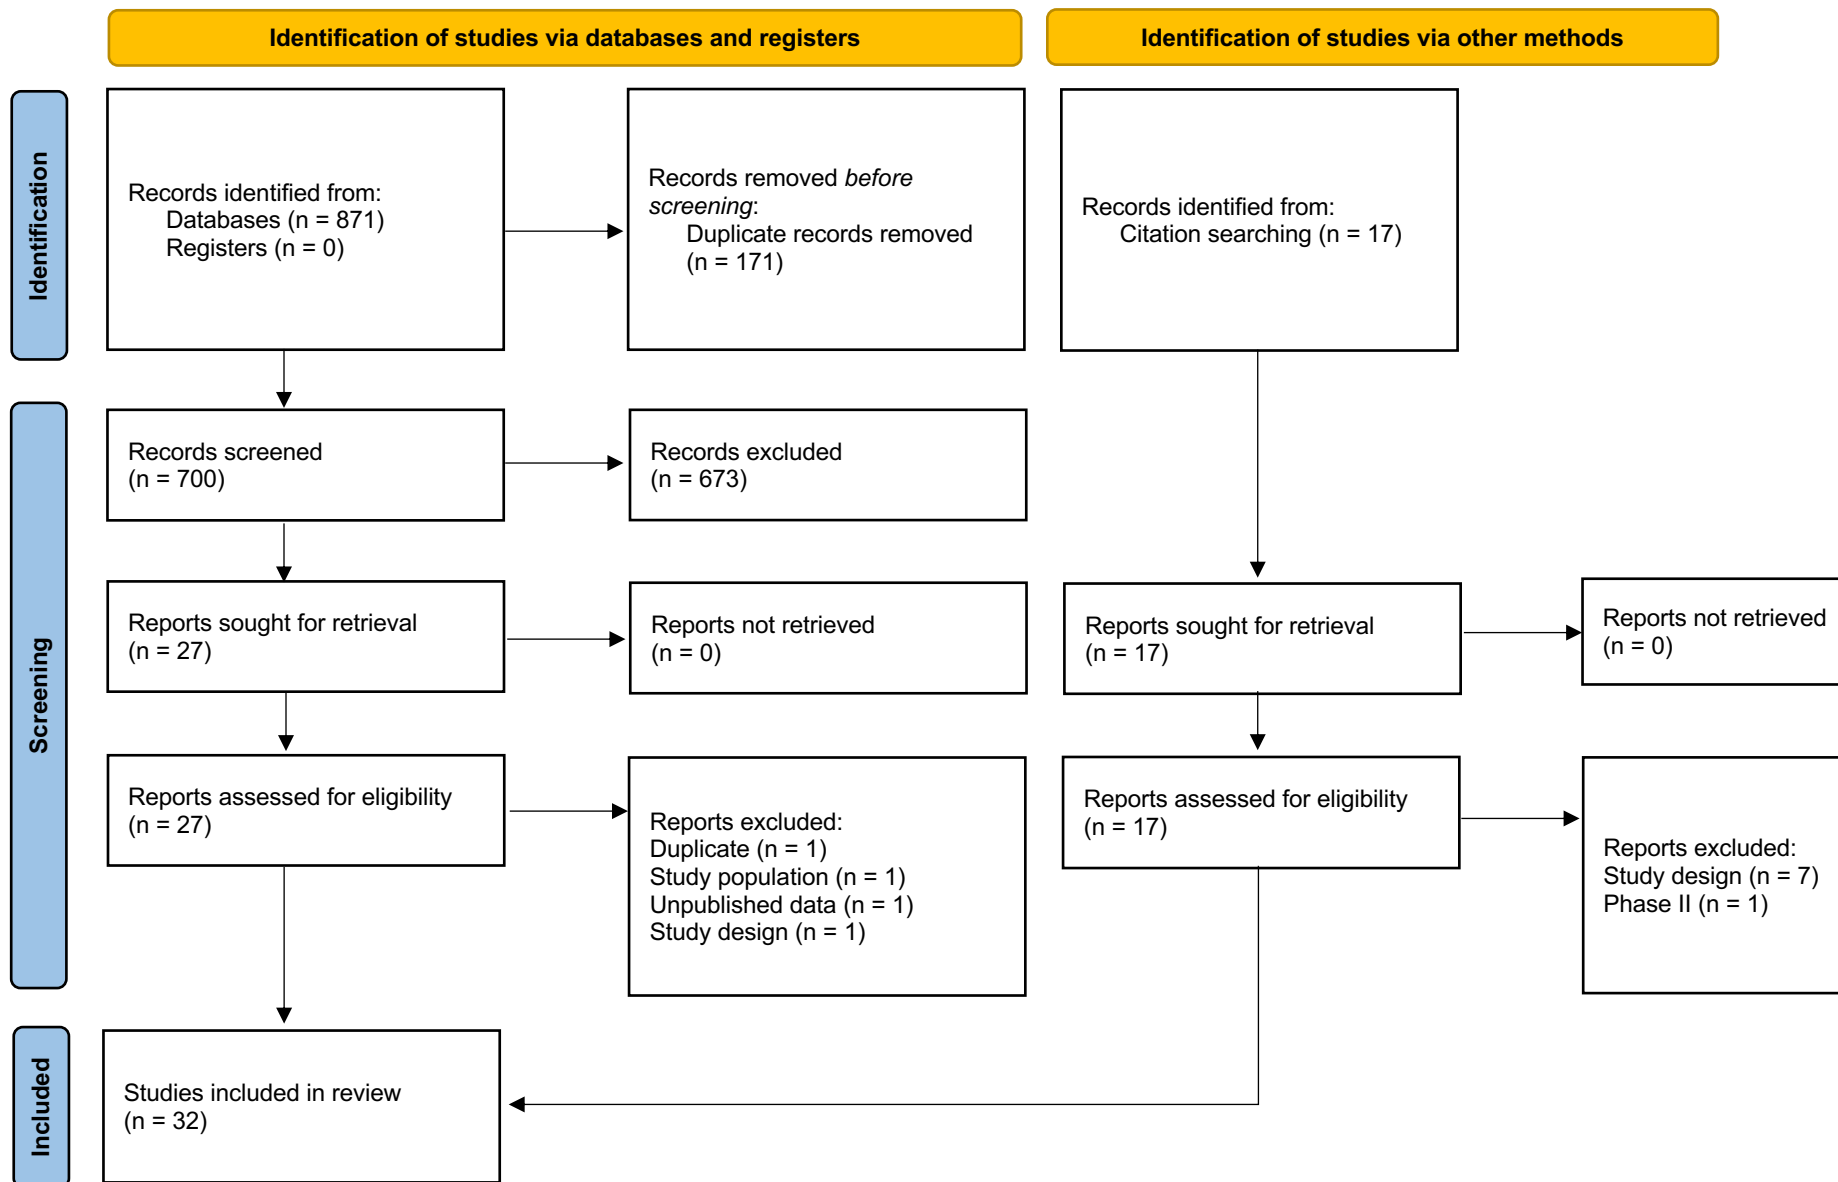

**Supplementary Figure 2: Subgroup analyses of included studies, stratified by systemic treatment, systemic prophylaxis, and topical treatment antifungal non-inferiority RCTs**

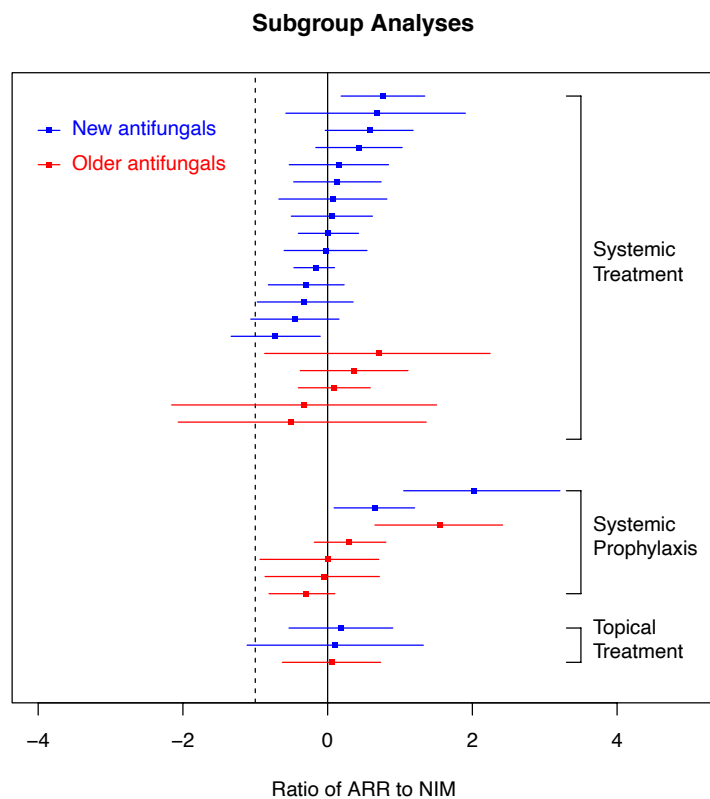

*Systemic treatment trials:* New antifungal NI-RCTs, in order from top to bottom: Reboli 2007, Kohno 2010, Mora-Duarte 2002, Rex 1994, Maertens 2016, Pappas 2007, Walsh 1999, Walsh 2004, Küse 2007, de Wet 2004, Krause 2004, Vazquez 2010, Kullberg 2005, Walsh 2002, Kullberg 2019. Older antifungal NI-RCTs, in order from top to bottom: Jeong 2016, Molloy 2018, Le 2017, Yoshida 2020, Benjamin 2018.

*Systemic prophylaxis trials:* New antifungal NI-RCTs, in order from top to bottom: Cornely 2007, van Burik 2004. Older antifungal NI-RCTs, in order from top to bottom: Marks 2011, Saliba 2015, Mersal 2013, Kang 2020, and Huang 2012.

*Topical treatment trials:* New antifungal NI-RCTs, in order from top to bottom: Chosidow 2003, de la Paz Cota 2018. Older antifungal trial represented in this section is Yim 2010.

**Supplementary Figure 3: Risk of bias assessment across individual included studies (RoB 2.0)**

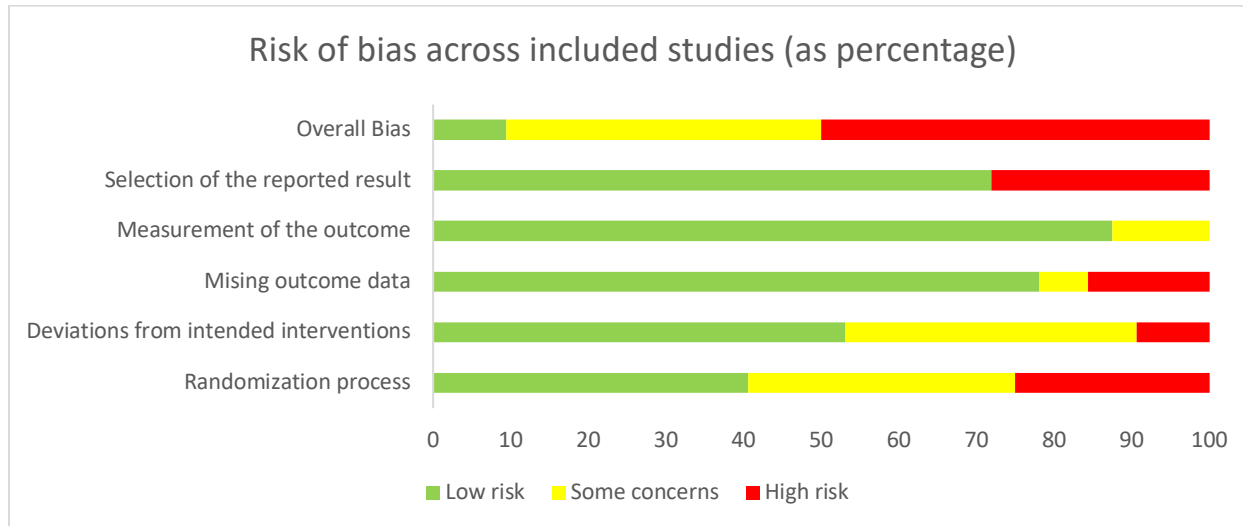

## Supplementary Text 1a: PRISMA 2020 Checklist

| Section and Topic             | Item # | Checklist item                                                                                                                                                                                                                                                                                       | Location where item is reported           |
|-------------------------------|--------|------------------------------------------------------------------------------------------------------------------------------------------------------------------------------------------------------------------------------------------------------------------------------------------------------|-------------------------------------------|
| <b>TITLE</b>                  |        |                                                                                                                                                                                                                                                                                                      |                                           |
| Title                         | 1      | Identify the report as a systematic review.                                                                                                                                                                                                                                                          | Page 1                                    |
| <b>ABSTRACT</b>               |        |                                                                                                                                                                                                                                                                                                      |                                           |
| Abstract                      | 2      | See the PRISMA 2020 for Abstracts checklist.                                                                                                                                                                                                                                                         | Supplementary Text 1b                     |
| <b>INTRODUCTION</b>           |        |                                                                                                                                                                                                                                                                                                      |                                           |
| Rationale                     | 3      | Describe the rationale for the review in the context of existing knowledge.                                                                                                                                                                                                                          | Introduction, paragraphs 1-3              |
| Objectives                    | 4      | Provide an explicit statement of the objective(s) or question(s) the review addresses.                                                                                                                                                                                                               | Introduction, paragraph 4                 |
| <b>METHODS</b>                |        |                                                                                                                                                                                                                                                                                                      |                                           |
| Eligibility criteria          | 5      | Specify the inclusion and exclusion criteria for the review and how studies were grouped for the syntheses.                                                                                                                                                                                          | Materials and Methods, paragraph 2        |
| Information sources           | 6      | Specify all databases, registers, websites, organisations, reference lists and other sources searched or consulted to identify studies. Specify the date when each source was last searched or consulted.                                                                                            | Materials and Methods, paragraph 1        |
| Search strategy               | 7      | Present the full search strategies for all databases, registers and websites, including any filters and limits used.                                                                                                                                                                                 | Supplementary Text 2                      |
| Selection process             | 8      | Specify the methods used to decide whether a study met the inclusion criteria of the review, including how many reviewers screened each record and each report retrieved, whether they worked independently, and if applicable, details of automation tools used in the process.                     | Materials and Methods, paragraph 3        |
| Data collection process       | 9      | Specify the methods used to collect data from reports, including how many reviewers collected data from each report, whether they worked independently, any processes for obtaining or confirming data from study investigators, and if applicable, details of automation tools used in the process. | Materials and Methods, paragraph 3        |
| Data items                    | 10a    | List and define all outcomes for which data were sought. Specify whether all results that were compatible with each outcome domain in each study were sought (e.g. for all measures, time points, analyses), and if not, the methods used to decide which results to collect.                        | Materials and Methods, paragraph 4        |
|                               | 10b    | List and define all other variables for which data were sought (e.g. participant and intervention characteristics, funding sources). Describe any assumptions made about any missing or unclear information.                                                                                         | Materials and Methods, paragraph 4        |
| Study risk of bias assessment | 11     | Specify the methods used to assess risk of bias in the included studies, including details of the tool(s) used, how many reviewers assessed each study and whether they worked independently, and if applicable, details of automation tools used in the process.                                    | Materials and Methods, paragraph 3        |
| Effect measures               | 12     | Specify for each outcome the effect measure(s) (e.g. risk ratio, mean difference) used in the synthesis or presentation of results.                                                                                                                                                                  | Materials and Methods, paragraphs 6 and 7 |
| Synthesis                     | 13a    | Describe the processes used to decide which studies were eligible for each synthesis (e.g.                                                                                                                                                                                                           | Materials and Methods, paragraphs         |

| Section and Topic             | Item # | Checklist item                                                                                                                                                                                                                                                                       | Location where item is reported                 |
|-------------------------------|--------|--------------------------------------------------------------------------------------------------------------------------------------------------------------------------------------------------------------------------------------------------------------------------------------|-------------------------------------------------|
| methods                       |        | tabulating the study intervention characteristics and comparing against the planned groups for each synthesis (item #5)).                                                                                                                                                            | 5-7                                             |
|                               | 13b    | Describe any methods required to prepare the data for presentation or synthesis, such as handling of missing summary statistics, or data conversions.                                                                                                                                | Materials and Methods, paragraphs 5-7           |
|                               | 13c    | Describe any methods used to tabulate or visually display results of individual studies and syntheses.                                                                                                                                                                               | Materials and Methods, paragraphs 5-7, Figure 1 |
|                               | 13d    | Describe any methods used to synthesize results and provide a rationale for the choice(s). If meta-analysis was performed, describe the model(s), method(s) to identify the presence and extent of statistical heterogeneity, and software package(s) used.                          | Materials and Methods, paragraphs 5-7           |
|                               | 13e    | Describe any methods used to explore possible causes of heterogeneity among study results (e.g. subgroup analysis, meta-regression).                                                                                                                                                 | Not applicable                                  |
|                               | 13f    | Describe any sensitivity analyses conducted to assess robustness of the synthesized results.                                                                                                                                                                                         | Not applicable                                  |
| Reporting bias assessment     | 14     | Describe any methods used to assess risk of bias due to missing results in a synthesis (arising from reporting biases).                                                                                                                                                              | Materials and Methods, paragraph 4              |
| Certainty assessment          | 15     | Describe any methods used to assess certainty (or confidence) in the body of evidence for an outcome.                                                                                                                                                                                | Not applicable                                  |
| <b>RESULTS</b>                |        |                                                                                                                                                                                                                                                                                      |                                                 |
| Study selection               | 16a    | Describe the results of the search and selection process, from the number of records identified in the search to the number of studies included in the review, ideally using a flow diagram.                                                                                         | Supplementary Figure 1                          |
|                               | 16b    | Cite studies that might appear to meet the inclusion criteria, but which were excluded, and explain why they were excluded.                                                                                                                                                          | Supplementary Table 1                           |
| Study characteristics         | 17     | Cite each included study and present its characteristics.                                                                                                                                                                                                                            | Table 1; Supplementary Table 2                  |
| Risk of bias in studies       | 18     | Present assessments of risk of bias for each included study.                                                                                                                                                                                                                         | Supplementary Table 4; Supplementary Figure 1   |
| Results of individual studies | 19     | For all outcomes, present, for each study: (a) summary statistics for each group (where appropriate) and (b) an effect estimate and its precision (e.g. confidence/credible interval), ideally using structured tables or plots.                                                     | Figure 1, Supplementary Table 3                 |
| Results of syntheses          | 20a    | For each synthesis, briefly summarise the characteristics and risk of bias among contributing studies.                                                                                                                                                                               | Supplementary Figure 2, Supplementary Table 4   |
|                               | 20b    | Present results of all statistical syntheses conducted. If meta-analysis was done, present for each the summary estimate and its precision (e.g. confidence/credible interval) and measures of statistical heterogeneity. If comparing groups, describe the direction of the effect. | Results, paragraphs 2-3                         |

| Section and Topic                              | Item # | Checklist item                                                                                                                                                                                                                             | Location where item is reported                                                       |
|------------------------------------------------|--------|--------------------------------------------------------------------------------------------------------------------------------------------------------------------------------------------------------------------------------------------|---------------------------------------------------------------------------------------|
|                                                | 20c    | Present results of all investigations of possible causes of heterogeneity among study results.                                                                                                                                             | Not applicable                                                                        |
|                                                | 20d    | Present results of all sensitivity analyses conducted to assess the robustness of the synthesized results.                                                                                                                                 | Not applicable                                                                        |
| Reporting biases                               | 21     | Present assessments of risk of bias due to missing results (arising from reporting biases) for each synthesis assessed.                                                                                                                    | Supplementary Figure 2, Supplementary Table 4                                         |
| Certainty of evidence                          | 22     | Present assessments of certainty (or confidence) in the body of evidence for each outcome assessed.                                                                                                                                        | Not applicable                                                                        |
| <b>DISCUSSION</b>                              |        |                                                                                                                                                                                                                                            |                                                                                       |
| Discussion                                     | 23a    | Provide a general interpretation of the results in the context of other evidence.                                                                                                                                                          | Discussion, paragraph 1                                                               |
|                                                | 23b    | Discuss any limitations of the evidence included in the review.                                                                                                                                                                            | Discussion, paragraph 2                                                               |
|                                                | 23c    | Discuss any limitations of the review processes used.                                                                                                                                                                                      | Discussion, paragraph 2                                                               |
|                                                | 23d    | Discuss implications of the results for practice, policy, and future research.                                                                                                                                                             | Discussion, paragraph 3                                                               |
| <b>OTHER INFORMATION</b>                       |        |                                                                                                                                                                                                                                            |                                                                                       |
| Registration and protocol                      | 24a    | Provide registration information for the review, including register name and registration number, or state that the review was not registered.                                                                                             | Materials and Methods, paragraph 1                                                    |
|                                                | 24b    | Indicate where the review protocol can be accessed, or state that a protocol was not prepared.                                                                                                                                             | Materials and Methods, paragraph 1                                                    |
|                                                | 24c    | Describe and explain any amendments to information provided at registration or in the protocol.                                                                                                                                            | Not applicable                                                                        |
| Support                                        | 25     | Describe sources of financial or non-financial support for the review, and the role of the funders or sponsors in the review.                                                                                                              | Funding                                                                               |
| Competing interests                            | 26     | Declare any competing interests of review authors.                                                                                                                                                                                         | Transparency declaration                                                              |
| Availability of data, code and other materials | 27     | Report which of the following are publicly available and where they can be found: template data collection forms; data extracted from included studies; data used for all analyses; analytic code; any other materials used in the review. | Data extracted from included studies and used for analysis in Appendix Tables 2 and 3 |

Adapted from Page *et al.* (33)

### Supplementary Text 1b: PRISMA 2020 Checklist for Abstracts

| Section and Topic       | Item # | Checklist item                                                                                                                                                                                                                                                                                        | Reported (Yes/No)           |
|-------------------------|--------|-------------------------------------------------------------------------------------------------------------------------------------------------------------------------------------------------------------------------------------------------------------------------------------------------------|-----------------------------|
| <b>TITLE</b>            |        |                                                                                                                                                                                                                                                                                                       |                             |
| Title                   | 1      | Identify the report as a systematic review.                                                                                                                                                                                                                                                           | Yes                         |
| <b>BACKGROUND</b>       |        |                                                                                                                                                                                                                                                                                                       |                             |
| Objectives              | 2      | Provide an explicit statement of the main objective(s) or question(s) the review addresses.                                                                                                                                                                                                           | Yes                         |
| <b>METHODS</b>          |        |                                                                                                                                                                                                                                                                                                       |                             |
| Eligibility criteria    | 3      | Specify the inclusion and exclusion criteria for the review.                                                                                                                                                                                                                                          | No (word count restriction) |
| Information sources     | 4      | Specify the information sources (e.g. databases, registers) used to identify studies and the date when each was last searched.                                                                                                                                                                        | No (word count restriction) |
| Risk of bias            | 5      | Specify the methods used to assess risk of bias in the included studies.                                                                                                                                                                                                                              | No (word count restriction) |
| Synthesis of results    | 6      | Specify the methods used to present and synthesise results.                                                                                                                                                                                                                                           | No (word count restriction) |
| <b>RESULTS</b>          |        |                                                                                                                                                                                                                                                                                                       |                             |
| Included studies        | 7      | Give the total number of included studies and participants and summarise relevant characteristics of studies.                                                                                                                                                                                         | Yes                         |
| Synthesis of results    | 8      | Present results for main outcomes, preferably indicating the number of included studies and participants for each. If meta-analysis was done, report the summary estimate and confidence/credible interval. If comparing groups, indicate the direction of the effect (i.e. which group is favoured). | No (word count restriction) |
| <b>DISCUSSION</b>       |        |                                                                                                                                                                                                                                                                                                       |                             |
| Limitations of evidence | 9      | Provide a brief summary of the limitations of the evidence included in the review (e.g. study risk of bias, inconsistency and imprecision).                                                                                                                                                           | Yes                         |
| Interpretation          | 10     | Provide a general interpretation of the results and important implications.                                                                                                                                                                                                                           | Yes                         |
| <b>OTHER</b>            |        |                                                                                                                                                                                                                                                                                                       |                             |
| Funding                 | 11     | Specify the primary source of funding for the review.                                                                                                                                                                                                                                                 | No (word count restriction) |
| Registration            | 12     | Provide the register name and registration number.                                                                                                                                                                                                                                                    | No (word count restriction) |

Adapted from Page et al. (33).



## Supplementary Text 2: Search strategies for MEDLINE, Embase, and Cochrane CENTRAL

Database: Ovid MEDLINE(R) and Epub Ahead of Print, In-Process & Other Non-Indexed Citations, Daily and Versions(R) <1946 to September 9, 2020>

Search Strategy:

- 
1. non-inferiority trial.mp. or exp Equivalence Trial/
  2. noninferior\*.mp.
  3. non-inferior\*.mp.
  4. 1 or 2 or 3
  5. exp Antifungal Agents/
  6. (antifungal\* or anti-fungal\*).mp.
  7. (allylamine\* or azole\* or benzylamine\* or echinocandin\* or polyene\* or oxaborole\*).mp.
  8. (amphotericin\* or butenafine\* or butoconazole\* or caspofungin\* or clotrimazole\* or econazole\* or efinaconazole\* or fluconazole\* or flucytosine\* or ibrexafungerp\* or isavuconazo\* or itraconazole\* or ketoconazole\* or luliconazole\* or micafungin\* or miconazole\* or naftifine\* or nystatin\* or oxiconazole\* or posaconazole\* or rezafungin\* or sertaconazole\* or tavaborole\* or terbinafine\* or terconazole\* or tioconazole\* or tolnaftate\* or voriconazole\*).mp.
  9. 5 or 6 or 7 or 8
  10. 4 and 9
  11. ((randomized controlled trial or controlled clinical trial).pt. or randomized.ab. or randomised.ab. or placebo.ab. or clinical trials as topic.sh. or randomly.ab. or trial.ti. or clinical trial\*.mp. or clinical trial.pt. or random\*.mp.) not (animals not (humans and animals)).sh.
  12. 10 and 11

Database: Embase <1974 to 2020 September 9>

Search Strategy:

- 
1. non-inferiority trial.mp. or exp Equivalence Trial/
  2. noninferior\*.mp.
  3. non-inferior\*.mp.
  4. 1 or 2 or 3
  5. exp Antifungal Agents/
  6. (antifungal\* or anti-fungal\*).mp.
  7. (allylamine\* or azole\* or benzylamine\* or echinocandin\* or polyene\* or oxaborole\*).mp.
  8. (amphotericin\* or butenafine\* or butoconazole\* or caspofungin\* or clotrimazole\* or econazole\* or efinaconazole\* or fluconazole\* or flucytosine\* or ibrexafungerp\* or isavuconazo\* or itraconazole\* or ketoconazole\* or luliconazole\* or micafungin\* or miconazole\* or naftifine\* or nystatin\* or oxiconazole\* or posaconazole\* or rezafungin\* or sertaconazole\* or tavaborole\* or terbinafine\* or terconazole\* or tioconazole\* or tolnaftate\* or voriconazole\*).mp.
  9. 5 or 6 or 7 or 8

10. 4 and 9

11. ((randomized controlled trial or controlled clinical trial).pt. or randomized.ab. or randomised.ab. or placebo.ab. or clinical trials as topic.sh. or randomly.ab. or trial.ti. or clinical trial\*.mp. or clinical trial.pt. or random\*.mp.) not (nonhumans not (human)).sh.

12. 10 and 11

Database: Cochrane CENTRAL

Search Strategy:

-----  
non-inferiority trial OR non-inferior\* OR noninferior\*

AND

antifungal agents OR antifungal\* OR anti-fungal\* OR allylamine\* OR azole\* OR benzylamine\* OR echinocandin\* OR polyene\* OR oxaborole\* OR amphotericin\* OR butenafine\* OR butoconazole\* OR caspofungin\* OR clotrimazole\* OR econazole\* OR efinaconazole\* OR fluconazole\* OR flucytosine\* OR ibrexafungerp\* OR isavuconazo\* OR itraconazole\* OR ketoconazole\* OR luliconazole\* OR micafungin\* OR miconazole\* OR naftifine\* OR nystatin\* OR oxiconazole\* OR posaconazole\* OR resafungin\* OR sertaconazole\* OR tavaborole\* OR terbinafine\* OR terconazole\* OR tioconazole\* OR tolnaftate\* OR voriconazole\*

## References

1. Benjamin DK, Jr., Kaufman DA, Hope WW, Smith PB, Arrieta A, Manzoni P, et al. A Phase 3 Study of Micafungin Versus Amphotericin B Deoxycholate in Infants With Invasive Candidiasis. *Pediatr Infect Dis J*. 2018;37(10):992-8.
2. Buechner SA. Multicenter, double-blind, parallel group study investigating the non-inferiority of efficacy and safety of a 2% miconazole nitrate shampoo in comparison with a 2% ketoconazole shampoo in the treatment of seborrheic dermatitis of the scalp. *J Dermatol Treat*. 2014;25(3):226-31.
3. Chosidow O, Maurette C, Dupuy P. Randomized, open-labeled, non-inferiority study between ciclopiroxolamine 1% cream and ketoconazole 2% foaming gel in mild to moderate facial seborrheic dermatitis. *Dermatology (Basel)*. 2003;206(3):233-40.
4. Cornely OA, Maertens J, Winston DJ, Perfect J, Ullmann AJ, Walsh TJ, et al. Posaconazole vs. Fluconazole or Itraconazole Prophylaxis in Patients with Neutropenia. *N Engl J Med*. 2007;356(4):348-59.
5. de la Paz Cota BR, Cepero Vega PP, Matus Navarrete JJ, Aguado Mulgado GE, Narváez Huerta JJ, Lamadrid Bautista E, et al. Efficacy and safety of eberconazole 1% otic solution compared to clotrimazole 1% solution in patients with otomycosis. *Am J Otolaryngol*. 2018;39(3):307-12.
6. de Wet NT, Bester AJ, Viljoen JJ, Filho F, Suleiman JM, Ticona E, et al. A randomized, double blind, comparative trial of micafungin (FK463) vs. fluconazole for the treatment of oesophageal candidiasis. *Aliment Pharm Ther*. 2005;21(7):899-907.
7. Huang X, Chen H, Han M, Zou P, Wu D, Lai Y, et al. Multicenter, randomized, open-label study comparing the efficacy and safety of micafungin versus itraconazole for prophylaxis of invasive fungal infections in patients undergoing hematopoietic stem cell transplant. *Biol Blood Marrow Transplant*. 2012;18(10):1509-16.
8. Jeong SH, Kim DY, Jang JH, Mun Y-C, Choi CW, Kim S-H, et al. Efficacy and safety of micafungin versus intravenous itraconazole as empirical antifungal therapy for febrile neutropenic patients with hematological malignancies: a randomized, controlled, prospective, multicenter study. *Ann Hematol*. 2016;95(2):337-44.
9. Kang W-H, Song G-W, Lee S-G, Suh K-S, Lee K-W, Yi N-J, et al. A Multicenter, Randomized, Open-Label Study to Compare Micafungin with Fluconazole in the Prophylaxis of Invasive Fungal Infections in Living-Donor Liver Transplant Recipients. *J Gastrointest Surg* 2020;24(4):832-40.
10. Kohno S, Izumikawa K, Ogawa K, Kurashima A, Okimoto N, Amitani R, et al. Intravenous micafungin versus voriconazole for chronic pulmonary aspergillosis: a multicenter trial in Japan. *J Infect*. 2010;61(5):410-8.
11. Krause DS, Simjee AE, van Rensburg C, Viljoen J, Walsh TJ, Goldstein BP, et al. A randomized, double-blind trial of anidulafungin versus fluconazole for the treatment of esophageal candidiasis. *Clin Infect Dis*. 2004;39(6):770-5.
12. Kullberg BJ, Sobel JD, Ruhnke M, Pappas PG, Viscoli C, Rex JH, et al. Voriconazole versus a regimen of amphotericin B followed by fluconazole for candidaemia in non-neutropenic patients: a randomised non-inferiority trial. *Lancet*. 2005;366(9495):1435-42.
13. Kullberg BJ, Viscoli C, Pappas PG, Vazquez J, Ostrosky-Zeichner L, Rotstein C, et al. Isavuconazole Versus Caspofungin in the Treatment of Candidemia and Other Invasive Candida Infections: The ACTIVE Trial. *Clin Infect Dis*. 2019;68(12):1981-9.

14. Küse E-R, Chetchotisakd P, da Cunha CA, Ruhnke M, Barrios C, Raghunadharao D, et al. Micafungin versus liposomal amphotericin B for candidaemia and invasive candidosis: a phase III randomised double-blind trial. *Lancet*. 2007;369(9572):1519-27.
15. Le T, Van Kinh N, Cuc NTK, Tung NLN, Lam NT, Thuy PTT, et al. A trial of itraconazole or amphotericin B for HIV-associated talaromycosis. *N Engl J Med*. 2017;376(24):2329-40.
16. Maertens JA, Raad, II, Marr KA, Patterson TF, Kontoyiannis DP, Cornely OA, et al. Isavuconazole versus voriconazole for primary treatment of invasive mould disease caused by *Aspergillus* and other filamentous fungi (SECURE): a phase 3, randomised-controlled, non-inferiority trial. *Lancet* 2016;387(10020):760-9.
17. Marks DI, Pagliuca A, Kibbler CC, Glasmacher A, Heussel CP, Kantecki M, et al. Voriconazole versus itraconazole for antifungal prophylaxis following allogeneic haematopoietic stem-cell transplantation. *Br J Haematol*. 2011;155(3):318-27.
18. Mersal A, Alzahrani I, Azzouz M, Alsubhi A, Alsawaigh H, Albshri N. Oral Nystatin Versus Intravenous Fluconazole as Neonatal Antifungal Prophylaxis: non-inferiority Trial. *J Clin Neonatol*. 2013;2(2):88-92.
19. Molloy SF, Kanyama C, Heyderman RS, Loyse A, Kouanfack C, Chanda D, et al. Antifungal combinations for treatment of cryptococcal meningitis in Africa. *N Engl J Med*. 2018;378(11):1004-17.
20. Mora-Duarte J, Betts R, Rotstein C, Colombo AL, Thompson-Moya L, Smietana J, et al. Comparison of caspofungin and amphotericin B for invasive candidiasis. *N Engl J Med*. 2002;347(25):2020-9.
21. Pappas PG, Rotstein CM, Betts RF, Nucci M, Talwar D, De Waele JJ, et al. Micafungin versus caspofungin for treatment of candidemia and other forms of invasive candidiasis. *Clin Infect Dis* 2007;45(7):883-93.
22. Queiroz-Telles F, Berezin E, Leverger G, Freire A, van der Vyver A, Chotpitayasunondh T, et al. Micafungin Versus Liposomal Amphotericin B for Pediatric Patients With Invasive Candidiasis: Substudy of a Randomized Double-Blind Trial. *Pediatr Infect Dis J*. 2008;27(9):820-6.
23. Reboli AC, Rotstein C, Pappas PG, Chapman SW, Kett DH, Kumar D, et al. Anidulafungin versus fluconazole for invasive candidiasis. *N Engl J Med*. 2007;356(24):2472-82.
24. Rex JH, Bennett JE, Sugar AM, Pappas PG, van der Horst CM, Edwards JE, et al. A Randomized Trial Comparing Fluconazole with Amphotericin B for the Treatment of Candidemia in Patients without Neutropenia. *N Engl J Med*. 1994;331(20):1325-30.
25. Saliba F, Pascher A, Cointault O, Laterre P-F, Cervera C, De Waele JJ, et al. Randomized trial of micafungin for the prevention of invasive fungal infection in high-risk liver transplant recipients. *Clin Infect Dis* 2015;60(7):997-1006.
26. van Burik JA, Ratanatharathorn V, Stepan DE, Miller CB, Lipton JH, Vesole DH, et al. Micafungin versus fluconazole for prophylaxis against invasive fungal infections during neutropenia in patients undergoing hematopoietic stem cell transplantation. *Clin Infect Dis*. 2004;39(10):1407-16.

27. Vazquez JA, Patton LL, Epstein JB, Ramlachan P, Mitha I, Noveljic Z, et al. Randomized, comparative, double-blind, double-dummy, multicenter trial of miconazole buccal tablet and clotrimazole troches for the treatment of oropharyngeal candidiasis: study of miconazole Lauriad® efficacy and safety (SMiLES). *HIV Clin Trials*. 2010;11(4):186-96.
28. Walsh TJ, Finberg RW, Arndt C, Hiemenz J, Schwartz C, Bodensteiner D, et al. Liposomal Amphotericin B for Empirical Therapy in Patients with Persistent Fever and Neutropenia. *N Engl J Med* 1999;340(10):764-71.
29. Walsh TJ, Pappas P, Winston DJ, Lazarus HM, Petersen F, Raffalli J, et al. Voriconazole Compared with Liposomal Amphotericin B for Empirical Antifungal Therapy in Patients with Neutropenia and Persistent Fever. *N Engl J Med*. 2002;346(4):225-34.
30. Walsh TJ, Teppler H, Donowitz GR, Maertens JA, Baden LR, Dmoszynska A, et al. Caspofungin versus liposomal amphotericin B for empirical antifungal therapy in patients with persistent fever and neutropenia. *N Engl J Med*. 2004;351(14):1391-402.
31. Yim SM, Ko JH, Lee YW, Kim HW, Lee JY, Kim NI, et al. Study to compare the efficacy and safety of fluconazole cream with flutrimazole cream in the treatment of superficial mycosis: a multicentre, randomised, double-blind, phase III trial. *Mycoses*. 2010;53(6):522-9.
32. Yoshida I, Saito AM, Tanaka S, Choi I, Hidaka M, Miyata Y, et al. Intravenous itraconazole compared with liposomal amphotericin B as empirical antifungal therapy in patients with neutropaenia and persistent fever. *Mycoses*. 2020;63(8):794-801.
33. Page MJ, McKenzie JE, Bossuyt PM, Boutron I, Hoffmann TC, Mulrow CD, et al. The PRISMA 2020 statement: an updated guideline for reporting systematic reviews. *BMJ* 2021;372:n71. doi: 10.1136/bmj.n71
